# Supplementary material
Source: Research Square preprint supplement (doi:10.21203/rs.3.rs-8920570/v1)
Supplement: Supplementary file 1 [file 27359060467b4f49802d7397.docx]

**“My community never drinks water from the tap:” A study of public trust in and acceptance of household drinking water.**

**Tables and Figures**

Table 1. MSP survey participant sociodemographic background

| **Racial and Ethnic Identity** | **Full Sample** | | |
| --- | --- | --- | --- |
| **Race/ethnicity categories*** | **Frequency** | **Percent of Respondents (n=983)** | |
| White | 372 | 36.7% | |
| Black or African American | 226 | 22.3% | |
| Asian | 203 | 20.0% | |
| Hispanic, Latino, or Spanish heritage | 113 | 11.1% | |
| American Indian or Alaska Native | 78 | 7.7% | |
| Middle Eastern or North African (MENA) | 8 | 0.8% | |
| Native Hawaiian or Other Pacific Islander | 8 | 0.8% | |
| Multiracial or biracial | 79 | 8.0% | |
| A race/ethnicity not listed (write-in option) | 17 | 3.1% | |
| **Sum of question responses** | 1104 | - | |
| **Grouped race/ethnicity categories** | **Frequency** | **Percent of Respondents (n=983)** | |
| Total identifying as multiracial (i.e., selecting multiracial category or selecting more than one race/ethnicity categories) | 150 | 15.3% | |
| Non-Hispanic White Only | 328 | 33.4% | |
| Grouped BIPOC category including Multiracial | 655 | 66.6% | |
| **Total question respondents** | 983 | - | |
| **Non-responses and “Prefer not to respond” category** | 69 | 6.6% | |
| **Survey participant total** | 1052 | - | |
| **Gender Identity*** | **Frequency** | **Percent of Respondents** | |
| Female | 570 | 56.7% | |
| Male | 389 | 38.7% | |
| Non-Binary/Gender Non-Conforming | 46 | 4.6% | |
| **Total question respondents** | 1005 | | 100% |
| **Non-responses and “Prefer not to respond” category** | 44 | |  |
| **Survey participant total** | 1052 | | - |
| **Homeownership Status** | **Frequency** | | **Percent of Respondents** |
| Renter | 485 | | 46.7% |
| Homeowner | 479 | | 46.1% |
| Other | 75 | | 7.2% |
| **Total question respondents** | 1039 | |  |
| **Household Income** | **Frequency** | | **Percent of Respondents** |
| Less than $20,000 | 146 | | 14.2% |
| $20,000-$34,999 | 115 | | 11.2 % |
| $35,000-$49,999 | 127 | | 12.3 % |
| $50,000-$74,999 | 191 | | 18.5% |
| $75,000-$99,999 | 123 | | 11.9% |
| $100,000-$149,999 | 142 | | 13.8% |
| $150,000 or more | 100 | | 9.7% |
| Prefer not to respond | 86 | | 8.3% |
| **Total question respondents** | 1030 | |  |
|  |  | |  |
| **Age** | **Frequency** | | **Percent of Respondents** |
| Younger (under 36 years of age) | 490 | | 49.1 |
| Older (36 years of age and older) | 507 | | 50.9 |
| **Total question respondents** | 997 | |  |

*Respondents could select more than one response

**Table 2.** Survey participants’ drinking water acceptance by race/ethnicity.

|  | Full sample | Non-Hispanic White Only | Hispanic, Latino or Spanish heritage | Black or African American | Asian | American Indian or Alaska Native |
| --- | --- | --- | --- | --- | --- | --- |
| Primarily drink water from the tap | 70 (700) | 91 (299)*** | 65 (69) | 50 (105)*** | 61 (117)** | 69 (50) |
| Trust that tap water is safe to drink | 58 (589) | 77 (249)*** | 56 (60) | 43 (92)*** | 54 (107) | 51 (39) |
| Worry about safety of drinking water from tap | 37 (390) | 16 (62)*** | 49 (55)** | 48 (109)*** | 42 (86) | 55 (43)*** |
| Trust local government sources of water information (index) | 49 (487) | 61 (198)*** | 52 (53) | 34 (71)*** | 53 (105) | 32 (24)** |
| Have reliable access to drinking water from the tap at home | 81 (817) | 93 (301)*** | 81 (86) | 70 (149)*** | 79 (157) | 75 (57) |
| Like the taste of drinking water from tap | 56 (578) | 76 (248)*** | 53 (58) | 43 (95)*** | 48 (96)** | 48 (37) |

Survey questions: Where do you primarily get your household drinking water? (response options include: the tap-from a public water supplier (e.g., city), purchased bottled water, the tap-from my private well, I don’t know/not sure; To what extent do you agree or disagree with the following? How much do you worry about the safety of drinking water from your tap at home? When it comes to water, to what extent do you trust or distrust the following sources of information? Cells include percent (frequency) of participants who responded somewhat to strongly agree/trust on 5-point scale and moderate to extreme amount of worry on a 4-point scale; Chi-square test of association across dichotomous variables, p-values =.001*** , .01**, .05=*

**Table 3.** Survey participant drinking water acceptance by socio-economic characteristics.

|  | Full sample | Renters | Home-owners | Younger | Older | Lower income | Higher income |
| --- | --- | --- | --- | --- | --- | --- | --- |
| Primarily drink water from the tap | 70 (700) | 65 (294)*** | 77 (359) | 67 (310)** | 76 (370) | 61 (218)*** | 76 (474) |
| Trust that tap water is safe to drink | 58 (589) | 52 (240)*** | 65 (306) | 55 (264)* | 62 (306) | 51 (186)*** | 62 (395) |
| Worry about safety of drinking water from tap | 37 (390) | 44 (212)*** | 32 (155) | 33 (162)* | 40 (202) | 43 (163)** | 34 (218) |
| Trust local government sources of water information (index) | 49 (487) | 43 (192)*** | 55 (256) | 48 (224) | 51 (252) | 39 (141)*** | 55 (341) |
| Have reliable access to drinking water from the tap at home | 81 (817) | 77 (352)*** | 86 (403) | 83 (391) | 81 (400) | 73 (267)*** | 86 (539) |
| Like the taste of drinking water from tap | 56 (578) | 45 (213)*** | 68 (324) | 54 (257) | 60 (300) | 46 (174) *** | 62 (395) |

Survey questions: Where do you primarily get your household drinking water? (response options include: the tap-from a public water supplier (e.g., city), purchased bottled water, the tap-from my private well, I don’t know/not sure; To what extent do you agree or disagree with the following? How much do you worry about the safety of drinking water from your tap at home? When it comes to water, to what extent do you trust or distrust the following sources of information? Cells include percent (frequency) of participants who responded somewhat to strongly agree/trust on 5-point scale and moderate to extreme amount of worry on a 4-point scale; Chi-square test of association across dichotomous variables, p-values =.001*** , .01**, .05=*

**Table 4.** Survey participant use of water treatments at home by race/ethnicity.

| **Race/ethnicity categories** | **Treat Water at Home** | | **Do Not Treat Water at Home** | |
| --- | --- | --- | --- | --- |
|  | **N** | **Percent** | **N** | **Percent** |
| Non-Hispanic White Only*** | 113 | 41.9 | 157 | 58.1 |
| Black or African American* | 105 | 66.0 | 54 | 34.0 |
| Asian*** | 102 | 76.7 | 31 | 23.3 |
| Hispanic, Latino, or Spanish heritage* | 55 | 69.6 | 24 | 30.4 |
| American Indian or Alaska Native | 32 | 61.5 | 20 | 38.5 |
| **Total question respondents** | 441 | 63.6 | 318 | 36.4 |

Participants could select more than one treatment option. Treatment options included pitcher filter, refrigerator filter system, sink filter, water softener, or whole house filter system. Chi-square test of association across dichotomous dummy variables, p-values =.001*** , .01**, .05=*

**Table 5.** Six drinking water acceptance multivariable logistic regression models.

|  | DRINKTAP | | TRUSTTAP | | WORRY | | TRUSTGOV | | RELIABLE | | LIKETASTE | |
| --- | --- | --- | --- | --- | --- | --- | --- | --- | --- | --- | --- | --- |
| R-square* | .213 | | .120 | | .134 | | .088 | | .138 | | .153 | |
| HLC | .918 | | .986 | | .745 | | .573 | | .344 | | .445 | |
| COP | 74.1 | | 63.2 | | 66.0 | | 61.0 | | 82.9 | | 66.5 | |
|  | *aOR*** | p-value | *aOR* | p-value | *aOR* | p-value | *aOR* | p-value | *aOR* | p-value | *aOR* | p-value |
| BAA | .623 | 0.14 | .661 | .026 |  |  | .560 | .003 | .623 | .031 |  |  |
| AIAN |  |  |  |  |  |  | .508 | .021 |  |  |  |  |
| NHWO | 6.358 | ≤.001 | 2.579 | ≤.001 | .327 | ≤.001 |  |  | 3.039 | .001 | 2.727 | ≤.001 |
| RENT |  |  | .711 | .035 | 1.567 | .007 | .729 | .047 | .621 | .026 | .425 | ≤.001 |
| YAGE |  |  |  |  | .542 | ≤.001 |  |  | 1.765 | .005 |  |  |
| LOINC | .571 | .002 | .694 | .022 |  |  | .610 | .002 | .492 | ≤.001 | .706 | .028 |

*Nagelkerke R-square, Hosmer Lemeshow Chi-square test, classification overall percentage

**Adjusted odds ratio
